# Supplementary material
Source: publisher site journal article supplement (https://www.dovepress.com/article/487038)
Supplement: Supplementary file 1 [file get_supplementary_file.php]

Survey Instrument 1.

Good, Better, How Survey

Start of Block: INFORMED CONSENT

INFORMED CONSENT

Kirk Kerkorian School of Medicine at University of Nevada Las Vegas, Department of Surgery.

Title of Study: Utilization of the “Good, Better, How” method of feedback in surgery 

Investigators: Whitney Elks MD, Abigail Cheng MD, Kencie Ely BS, Mark Guadagnoli PhD, Charles St. Hill MD MSc

You are invited to participate in a mixed-methods research study titled “Utilization of the “Good, Better, How” method of feedback in surgery”. The purpose of this study is to educate surgery faculty, fellows and residents on the implementation of Good, Better, How (GBH) through workshops and to determine whether implementation of GBH improves perceptions on giving and receiving feedback using a pre-workshop survey, a GBH workshop, a post-workshop survey, and focus group discussion.

You are being asked to participate in the study because you fit these criteria:

[1] You are currently faculty, a fellow or a resident in the Department of Surgery
[2] You are willing to provide voluntary informed consent for the study 
[3] You are at least 18 years of age

Your participation in this study is voluntary. You may refuse to participate in this study or in any part of this study. You may withdraw at any time without prejudice. If you volunteer to participate in this study, you will be asked to do the following: Complete a brief pre-assessment anonymous survey, participate in a workshop, complete a brief post-assessment anonymous survey, and participate in a 20-minute focus group discussion. The survey will be disseminated electronically. There will not be a financial cost to you to participate in this study. The survey will take less than 10 minutes of your time. You will not be compensated for your time. There may be direct benefits to you as a participant in this study such as the ability to encourage successful behaviors, discourage behaviors that yield suboptimal performance, establish a method for improving behaviors and strategies, and improve the relationship between the giver and receiver of feedback. This will ultimately improve medical education in the department of surgery at this institution.

All information gathered in this study will be kept as confidential as possible. No reference will be made in written or oral materials that could link you to this study. All records will be stored in a password-protected encrypted database in the secure UNLV network for 6 years after completion of the study. After the storage time, the information gathered will be destroyed. Your responses will be anonymous and data collected will not be shared with anyone outside the research team. No personal identifiers regarding the participant will be requested at any time.

The focus groups will immediately follow the post-survey. They will last approximately 20 minutes. Participants will be divided into small groups and asked to discuss thoughts and opinions regarding the implementation of the GBH method of feedback in surgical training. Confidentiality cannot be guaranteed in the focus group setting. Responses in the focus groups will be audio recorded and transcribed. Responses will not be linked to participants in any oral or written material.

If you have any questions or concerns about the project, you may contact Whitney Elks at whitney.elks@unlv.edu, Dr. Mark Guadagnoli at mark.guadagnoli@unlv.edu, Dr. Charles St. Hill at charles.sthill@unlv.edu, or IRB@unlv.edu.

Participant Consent: I have read the above information and agree to participate in this study.

Do you agree to participate?

- Yes
- No

Skip To: End of Survey If INFORMED CONSENT Kirk Kerkorian School of Medicine at University of Nevada Las Vegas, Department... = No

| Page Break |  |
| --- | --- |

This section will ask you about your characteristics.

Do you work directly with undergraduate and/or graduate medical trainees (students, residents and/or fellows)?

- Yes
- No

Have you had exposure/experience with the “Good, Better, How” method of feedback prior to this study?

- Yes
- No

What is your role in this study?

- Instructor (includes all faculty, fellows and 5th year residents)
- Learner (includes all 1st, 2nd, 3rd and 4th year residents)

If you are an ***instructor*** in this study (includes all faculty, fellows and 5th year residents), how long ago did you complete your graduate medical education (including fellowship if applicable)?

- Not applicable, I am a learner in this study
- Currently in residency
- Currently in fellowship
- 0-5 years
- 6-10 years
- 11-15 years
- 16-20 years
- 21+ years

If you are a ***learner*** in this study (includes all 1st, 2nd, 3rd and 4th year residents), what postgraduate year are you in?

- Not applicable, I am an instructor in this study
- PGY1
- PGY2
- PGY3
- PGY4
- PGY5
- PGY6

What is your gender?

- Male
- Female
- Nonbinary
- Other, please specify __________________________________________________
- Choose not to disclose

What is your ethnicity?

- Hispanic or Latinx
- Non-Hispanic or Latinx
- Prefer not to disclose

What is your race?

- White
- Black or African American
- Asian
- Multiracial origin
- Other, please specify __________________________________________________
- Prefer not to disclose

End of Block: INFORMED CONSENT

Start of Block: PRE-WORKSHOP QUESTIONS: GIVING FEEDBACK

PRE-WORKSHOP: Please answer the following questions regarding ***giving*** feedback.

How would you rate your current skill level of giving feedback?

- Low skill = Little to no ability or knowledge
- Basic skill = Limited in ability and knowledge
- Proficient skill = Moderate ability and knowledge; Capable and experienced
- Expert skill = Advanced ability and knowledge; Fully capable & experienced

How important is giving feedback in surgical training?

- Very important
- Important
- Undecided
- Somewhat not important
- Not important at all

How satisfied are you with the amount of instruction you have been given on how to provide feedback?

- Very satisfied
- Satisfied
- Undecided
- Unsatisfied
- Very unsatisfied

You believe the learner understands that he/she is receiving feedback when you are providing it.

- Almost always
- Most of the time
- Some of the time
- Not usually
- Rarely

You give feedback at appropriate times.

- Almost always
- Most of the time
- Some of the time
- Not usually
- Rarely

The feedback you give is on direct observations and non-judgmental.

- Almost always
- Most of the time
- Some of the time
- Not usually
- Rarely

When you are giving feedback, it is bidirectional in which both you and the learner are contributing to the conversation.

- Almost always
- Most of the time
- Some of the time
- Not usually
- Rarely

When you give feedback, you help the learner create actionable learning goals during the interaction.

- Almost always
- Most of the time
- Some of the time
- Not usually
- Rarely

How satisfied are you with the amount of feedback you currently provide?

- Very satisfied
- Satisfied
- Undecided
- Unsatisfied
- Very unsatisfied

You feel like you give effective daily feedback, however you are told that you do not.

- Strongly agree
- Agree
- Undecided
- Disagree
- Strongly disagree

End of Block: PRE-WORKSHOP QUESTIONS: GIVING FEEDBACK

Start of Block: PRE-WORKSHOP QUESTIONS: RECEIVING FEEDBACK

PRE-WORKSHOP: Please answer the following questions regarding ***receiving*** feedback.

You receive effective feedback.

- Almost always
- Most of the time
- Some of the time
- Not usually
- Rarely

How important is receiving feedback in surgical training?

- Very important
- Important
- Undecided
- Not important
- Not important at all

It is clear to you when you are receiving feedback.

- Almost always
- Most of the time
- Some of the time
- Not usually
- Rarely

The feedback you have been given is at an appropriate time.

- Almost always
- Most of the time
- Some of the time
- Not usually
- Rarely

The feedback you receive is on direct observations and non-judgmental.

- Almost always
- Most of the time
- Some of the time
- Not usually
- Rarely

When you are receiving feedback, it is bidirectional in which both you and your feedback giver are contributing to the conversation.

- Almost always
- Most of the time
- Some of the time
- Not usually
- Rarely

When you have been provided feedback in the past, you created actionable learning goals with the feedback provider during the interaction.

- Almost always
- Most of the time
- Some of the time
- Not usually
- Rarely

How satisfied are you with the amount of feedback you currently receive?

- Very satisfied
- Satisfied
- Undecided
- Unsatisfied
- Very unsatisfied

The feedback you receive is overall encouraging.

- Strongly agree
- Agree
- Undecided
- Disagree
- Strongly disagree

End of Block: PRE-WORKSHOP QUESTIONS: RECEIVING FEEDBACK

Start of Block: SURVEY BREAK FOR WORKSHOP PARTICIPATION

**STOP!** At this time, please do not move forward in this survey. Leave this survey link open.

 You will now complete the in-person workshop.

 You will return to this survey after the workshop for completion.

End of Block: SURVEY BREAK FOR WORKSHOP PARTICIPATION

Start of Block: POST-WORKSHOP QUESTIONS: GIVING FEEDBACK

POST-WORKSHOP: Please answer the following questions regarding ***giving*** feedback.

How would you rate your current skill level of giving feedback?

- Low skill = Little to no ability or knowledge
- Basic skill = Limited in ability or knowledge
- Proficient skill = Moderate ability and knowledge; Capable and experienced
- Expert skill = Advanced ability and knowledge; Fully capable & experienced

How important is giving feedback in surgical training?

- Very important
- Important
- Undecided
- Not important
- Not important at all

How satisfied are you with the amount of instruction you have been given on how to give feedback?

- Very satisfied
- Satisfied
- Undecided
- Unsatisfied
- Very unsatisfied

You make it clear to the learner when you are giving feedback.

- Almost always
- Most of the time
- Some of the time
- Not usually
- Rarely

You give feedback at appropriate times.

- Almost always
- Most of the time
- Some of the time
- Not usually
- Rarely

The feedback you give is on direct observations and non-judgmental.

- Almost always
- Most of the time
- Some of the time
- Not usually
- Rarely

When you are giving feedback, it is bidirectional in which both you and the learner are contributing to the conversation.

- Almost always
- Most of the time
- Some of the time
- Not usually
- Rarely

When you give feedback, you help the learner create actionable learning goals during the interaction.

- Almost always
- Most of the time
- Some of the time
- Not usually
- Rarely

How satisfied are you with the amount of feedback you currently provide?

- Very satisfied
- Satisfied
- Undecided
- Unsatisfied
- Very unsatisfied

How likely are you to implement the GBH method of feedback into your teaching?

- Very likely
- Likely
- Undecided
- Unlikely
- Very unlikely

End of Block: POST-WORKSHOP QUESTIONS: GIVING FEEDBACK

Start of Block: POST-WORKSHOP: RECEIVING FEEDBACK

POST-WORKSHOP: Please answer the following questions regarding ***receiving*** feedback.

You receive effective feedback.

- Almost always
- Most of the time
- Some of the time
- Not usually
- Rarely

How important is receiving feedback in surgical training?

- Very important
- Important
- Undecided
- Not important
- Not important at all

It is clear to you when you are receiving feedback.

- Almost always
- Most of the time
- Some of the time
- Not usually
- Rarely

The feedback you have been given is at an appropriate time.

- Almost always
- Most of the time
- Some of the time
- Not usually
- Rarely

The feedback you receive is on direct observations and non-judgmental.

- Almost always
- Most of the time
- Some of the time
- Not usually
- Rarely

When you are receiving feedback, it is bidirectional in which both you and your feedback giver are contributing to the conversation.

- Almost always
- Most of the time
- Some of the time
- Not usually
- Rarely

When you have been provided feedback in the past, you created actionable learning goals with the feedback provider during the interaction.

- Almost always
- Most of the time
- Some of the time
- Not usually
- Rarely

How satisfied are you with the amount of feedback you currently receive?

- Very satisfied
- Satisfied
- Undecided
- Unsatisfied
- Very unsatisfied

The feedback you receive is overall encouraging.

- Strongly agree
- Agree
- Undecided
- Disagree
- Strongly disagree

On a scale of 1-10, with 1 being not beneficial at all and 10 being extremely beneficial, how would you rate the GBH method?

▼ 1 ... 10

End of Block: POST-WORKSHOP: RECEIVING FEEDBACK

**Survey Instrument 2.**

GBH 1-month Post-Workshop Survey

Start of Block:

Did you attend one of the "Good, Better, How" Feedback Workshops?

- Yes
- No

Skip To: End of Survey If Did you attend one of the "Good, Better, How" Feedback Workshops? = No

| Page Break |  |
| --- | --- |

What level of training are you currently in?

- Attending
- Fellowship
- PGY-5
- PGY-4
- PGY-3
- PGY-2
- PGY-1

End of Block:

Start of Block: Utilizing the "Good, Better, How" method of feedback

How often were you involved in a feedback discussion utilizing the "Good, Better, How" method of feedback?

- 0 times in the last month
- 1-4 times in the last month
- 5-8 times in the last month
- 9-12 times in the last month
- 13 or more times in the last month

How did utilizing the "Good, Better, How" method of feedback affect the quality of feedback you received in your surgical training?

- Unable to answer, I did not use this method of feedback
- Greatly improved
- Slightly improved
- Unaffected
- Slightly worsened
- Greatly worsened

End of Block: Utilizing the "Good, Better, How" method of feedback

Start of Block: 1-MONTH POST-WORKSHOP QUESTIONS: GIVING FEEDBACK

Please answer the following questions regarding ***giving*** feedback.

How would you rate your current skill level of giving feedback?

- Low skill = Little to no ability or knowledge
- Basic skill = Limited in ability or knowledge
- Proficient skill = Moderate ability and knowledge; Capable and experienced
- Expert skill = Advanced ability and knowledge; Fully capable & experienced

How important is giving feedback in surgical training?

- Very important
- Important
- Undecided
- Not important
- Not important at all

How satisfied are you with the amount of instruction you have been given on how to give feedback?

- Very satisfied
- Satisfied
- Undecided
- Unsatisfied
- Very unsatisfied

You make it clear to the learner when you are giving feedback.

- Almost always
- Most of the time
- Some of the time
- Not usually
- Rarely

You give feedback at appropriate times.

- Almost always
- Most of the time
- Some of the time
- Not usually
- Rarely

The feedback you give is on direct observations and non-judgmental.

- Almost always
- Most of the time
- Some of the time
- Not usually
- Rarely

When you are giving feedback, it is bidirectional in which both you and the learner are contributing to the conversation.

- Almost always
- Most of the time
- Some of the time
- Not usually
- Rarely

When you give feedback, you help the learner create actionable learning goals during the interaction.

- Almost always
- Most of the time
- Some of the time
- Not usually
- Rarely

How satisfied are you with the amount of feedback you currently provide?

- Very satisfied
- Satisfied
- Undecided
- Unsatisfied
- Very unsatisfied

End of Block: 1-MONTH POST-WORKSHOP QUESTIONS: GIVING FEEDBACK

Start of Block: 1-MONTH POST-WORKSHOP: RECEIVING FEEDBACK

Please answer the following questions regarding ***receiving*** feedback.

You receive effective feedback.

- Almost always
- Most of the time
- Some of the time
- Not usually
- Rarely

How important is receiving feedback in surgical training?

- Very important
- Important
- Undecided
- Not important
- Not important at all

It is clear to you when you are receiving feedback.

- Almost always
- Most of the time
- Some of the time
- Not usually
- Rarely

The feedback you have been given is at an appropriate time.

- Almost always
- Most of the time
- Some of the time
- Not usually
- Rarely

The feedback you receive is on direct observations and non-judgmental.

- Almost always
- Most of the time
- Some of the time
- Not usually
- Rarely

When you are receiving feedback, it is bidirectional in which both you and your feedback giver are contributing to the conversation.

- Almost always
- Most of the time
- Some of the time
- Not usually
- Rarely

When you have been provided feedback in the past, you created actionable learning goals with the feedback provider during the interaction.

- Almost always
- Most of the time
- Some of the time
- Not usually
- Rarely

How satisfied are you with the amount of feedback you currently receive?

- Very satisfied
- Satisfied
- Undecided
- Unsatisfied
- Very unsatisfied

The feedback you receive is overall encouraging.

- Strongly agree
- Agree
- Undecided
- Disagree
- Strongly disagree

End of Block: 1-MONTH POST-WORKSHOP: RECEIVING FEEDBACK

**Supplementary Table 1: Comparing pre/post differences in the mean scores of the other survey items asked with regards to the GBH method (N=44)**

| **Survey Items** | **Pre-GBH** | **Post-GBH** | **Mean Difference** | **P value** | **95% CI of the Mean difference** |
| --- | --- | --- | --- | --- | --- |
| *You give feedback at appropriate times.* | 3.75±0.866 | 3.91±0.741 | -0.159 | 0.164 | -0.3857, 0.0675 |
| *The feedback you give is on direct observations and non-judgmental.* | 4.11±0.689 | 4.05±0.645 | 0.068 | 0.570 | -0.1718, 0.3082 |
| *When you are giving feedback, it is bidirectional in which both you and the learner are contributing to the conversation.* | 3.75±0.918 | 3.86±0.702 | -0.114 | 0.390 | -0.3777, 0.1504 |
| *When you give feedback, you help the learner create actionable learning goals during the interaction.* | 3.66±0.776 | 3.86±0.702 | -0.205 | 0.071 | -0.4277, 0.0186 |
| *You receive effective feedback.* | 3.23±0.803 | 3.39±0.945 | -0.159 | 0.197 | -0.4039, 0.0857 |
| *It is clear to you when you are receiving feedback.* | 3.56±0.934 | 3.7±0.939 | -0.140 | 0.262 | -0.387, 0.108 |
| *The feedback you have been given is at an appropriate time.* | 3.59±0.972 | 3.75±0.811 | -0.159 | 0.197 | -0.4039, 0.0857 |
| *The feedback you receive is on direct observations and non-judgmental.* | 3.45±1.022 | 3.7±0.734 | -0.250 | 0.054 | -0.505, 0.005 |
| *When you are receiving feedback, it is bidirectional in which both you and your feedback giver are contributing to the conversation.* | 3.39±0.841 | 3.52±0.927 | -0.136 | 0.278 | -0.3868, 0.1141 |
| *When you have been provided feedback in the past, you created actionable learning goals with the feedback provider during the interaction.* | 3.34±0.745 | 3.77±0.803 | -0.432 | **0.002** | -0.6973, -0.1663 |

**Scale**: Rarely (1), Not usually (2), Some of the time (3), Most of the time (4), Almost always (5)

**Appendices with insignificant survey findings**

**Appendix A.1: Feedback at appropriate times pre and post differences**

| **Variable** | **Categories** | **Pre-GBH** | **Post-GBH** | **P value** | **Test Statistic** |
| --- | --- | --- | --- | --- | --- |
| Feedback at appropriate times | Not usually | 1 (2.3) | 1 (2.3) | 0.32 | 37.00 |
|  | Rarely/ Some of the time | 15 (34.1) | 11 (25.0) |  |  |
|  | Most of the time | 20 (45.5) | 23 (52.3) |  |  |
|  | Almost always | 8 (18.2) | 9 (20.5) |  |  |

**Appendix A.2: Feedback - direct observation pre and post differences (N=44)**

| **Variable** | **Categories** | **Pre-GBH** | **Post-GBH** | **P value** | **Test Statistic** |
| --- | --- | --- | --- | --- | --- |
| Direct observation | Not usually / Some of the time | 8 (18.2) | 6 (13.6) | 0.68 | 21.00 |
|  | Most of the time | 23 (52.3) | 29 (65.9) |  |  |
|  | Almost always | 13 (29.5) | 9 (20.5) |  |  |

**Appendix A.3.: Feedback - bidirectional pre and post differences (N=44)**

| **Variable** | **Categories** | **Pre-GBH** | **Post-GBH** | **P value** | **Test Statistic** |
| --- | --- | --- | --- | --- | --- |
| Bidirectional | Not usually / Some of the time | 19 (43.2) | 14 (31.8) | 0.71 | 16.00 |
|  | Most of the time | 14 (31.8) | 22 (50.0) |  |  |
|  | Almost always | 11 (25.0) | 8 (18.2) |  |  |

**Appendix A.4: Feedback – actionable learning goals pre and post differences (N=44)**

| **Variable** | **Categories** | **Pre-GBH** | **Post-GBH** | **P value** | **Test Statistic** |
| --- | --- | --- | --- | --- | --- |
| Actionable learning goals | Some of the time | 23 (52.3) | 14 (31.8) | 0.072 | 10.00 |
|  | Most of the time | 13 (29.5) | 22 (50.0) |  |  |
|  | Almost always | 8 (18.2) | 8 (18.2) |  |  |

**Appendix A.5: Receive effective feedback - pre and post differences (N=44)**

| **Variable** | **Categories** | **Pre-GBH** | **Post-GBH** | **P value** | **Test Statistic** |
| --- | --- | --- | --- | --- | --- |
| Receive effective feedback | Not usually | 6 (13.6) | 3 (6.8) | 0.07 | 21.00 |
|  | Rarely/Some of the time | 21 (47.7) | 22 (50.0) |  |  |
|  | Most of the time | 16 (36.4) | 14 (31.8) |  |  |
|  | Almost always | 1 (2.3) | 5 (11.4) |  |  |

**Appendix A.6: Important is receiving feedback in surgical training - pre and post differences (N=44)**

| **Variable** | **Categories** | **Pre-GBH** | **Post-GBH** | **P value** | **Test Statistic** |
| --- | --- | --- | --- | --- | --- |
| Important is receiving feedback in surgical training | Undecided | 4 (9.1) | 1 (2.3) | 0.17 | 6.00 |
|  | Important | 8 (18.2) | 9 (20.5) |  |  |
|  | Very important | 32 (72.7) | 34 (77.3) |  |  |

**Appendix A.7: Clear to you when you receive feedback - pre and post differences (N=44)**

| **Variable** | **Categories** | **Pre-GBH** | **Post-GBH** | **P value** | **Test Statistic** |
| --- | --- | --- | --- | --- | --- |
| Clear to you when you receive feedback | Not usually | 4 (9.1) | 4 (9.1) | 0.45 | 36 |
|  | Rarely/Some of the time | 15 (34.1) | 15 (34.1) |  |  |
|  | Most of the time | 18 (40.9) | 14 (31.8) |  |  |
|  | Almost always | 7 (15.9) | 10 (22.7) |  |  |

**Appendix A.8: Feedback given at an appropriate time- pre and post differences (N=44)**

| **Variable** | **Categories** | **Pre-GBH** | **Post-GBH** | **P value** | **Test Statistic** |
| --- | --- | --- | --- | --- | --- |
| Feedback given at an appropriate time | Not usually | 4 (9.1) | 2 (4.5) | 0.35 | 31.00 |
|  | Rarely/Some of the time | 16 (36.4) | 15 (34.1) |  |  |
|  | Most of the time | 16 (36.4) | 18 (43.2) |  |  |
|  | Almost always | 8 (18.2) | 8 (18.2) |  |  |

**Appendix A.9: Feedback Direct observational- pre and post differences (N=44)**

| **Variable** | **Categories** | **Pre-GBH** | **Post-GBH** | **P value** | **Test Statistic** |
| --- | --- | --- | --- | --- | --- |
| Feedback Direct observational | Not usually | 2 (4.5) | 1 (2.3) | 0.28 | 22.00 |
|  | Rarely/Some of the time | 20 (45.5) | 17 (38.6) |  |  |
|  | Most of the time | 16 (36.4) | 20 (45.5) |  |  |
|  | Almost always | 6 (13.6) | 6 (13.6) |  |  |

**Appendix A.10: Feedback bi-directional - pre and post differences (N=44)**

| **Variable** | **Categories** | **Pre-GBH** | **Post-GBH** | **P value** | **Test Statistic** |
| --- | --- | --- | --- | --- | --- |
| Feedback Direct observational | Not usually | 4 (9.1) | 3 (6.8) | 0.24 | 27.00 |
|  | Rarely/Some of the time | 20 (45.5) | 20 (45.5) |  |  |
|  | Most of the time | 17 (38.6) | 14 (31.8) |  |  |
|  | Almost always | 3 (6.8) | 7 (15.9) |  |  |

**Appendix A.11: Feedback received encouraging - pre and post differences**

| **Variable** | **Categories** | **Pre-GBH** | **Post-GBH** | **P value** | **Test Statistic** |
| --- | --- | --- | --- | --- | --- |
| Feedback received encouraging | Undecided | 13 (29.5) | 11 (25.0) | 0.22 | 35.00 |
|  | Disagree | 2 (4.5) | 1 (2.3) |  |  |
|  | Strongly disagree | 2 (4.5) | 1 (2.3) |  |  |
|  | Agree | 25 (56.8) | 26 (59.1) |  |  |
|  | Strongly agree | 2 (4.5) | 5 (11.4) |  |  |

**Supplementary Material. Complete table of themes and subthemes from focus groups**

| THEMES AND SUBTHEMES | # of mentions; Immediate | # of mentions; 1-month post | Representative quotes |
| --- | --- | --- | --- |
| **Theme 1: Benefits** |  |  |  |
| Subtheme 1: Engaging conversation | 31 | 39 | “I think that can be an advantage of this because you know where they're coming from. Like if you just give them feedback without it going both ways, then you don't know where they're starting.” - Faculty  “Good, Better, How is like a full discussion.” – Junior  “I start with, ‘What do you think went well in this situation?’ And then they'll tell me. Then I'll usually agree or disagree politely and then we'll go from there. - Senior/Fellow  “‘No, I think you did a great job. I was just stressed out; it was a heated situation and maybe you could have done this thing differently or better.’” - Senior/fellow |
| Subtheme 2: Learner Insight | 6 | 10 | “She (learner) kind of directed the conversation.” – Faculty  “If I feel like I'm part of the equation of my feedback, I have a sense of control in that situation.” - Senior |
| Subtheme 3: Opportunity for Growth | 15 | 22 | “So if they thought that, oh, everything went great and you're like, Well, actually this is a place that needs to be better. I think that this allows you to get that information from them and then correct them.” - Faculty |
| Subtheme 4: Personal Responsibility, Accountability, Commitment | 40 | 47 | “‘I think it would be better if you grab the needle at this angle. And how are you going to practice at home and then come up with a plan?’” - Senior/Fellow  “Discuss an action item at the end.” - Senior/fellow  “If you're able to internalize it but use GBH on yourself, then you can be more self-guided which I think residency is all about learning in a self-guided manner and so being able to take in feedback in any which method but internalizing in a way that works for you that is productive is really important.” - Junior |
| Subtheme 5: Positive Culture | 58 | 66 | “The GBH method is something that's more structured, and in the grand scheme of things, is going to be more of a positive change on surgical training.” - Junior  “Rapport with you guys has been good.” - Senior/fellow  “It's a little bit more of a laid-back learning environment.” - Junior |
| Subtheme 6: Builds Confidence | 5 | 6 | “Sometimes you know what people did good without them realizing what they did good. And so sometimes I like to start off by saying ‘You did this really well.’” - Senior/fellow |
| Subtheme 7: Culture of Improvement | 31 | 36 | “...when it kind of comes down to the part of what can you do better and how to do it, it's really softens that part of not just, ‘Oh my God, I can't believe you did this and you need to fix that.’ It's ‘We've now had this conversation and we can chat about it and actually have some improvement by the end of the feedback session’” - Faculty  “It brings the feedback in general to the forefront of people's minds and then the attendings are like, ‘Oh, we should give you feedback,’ and then they will.” - Junior |
| Subtheme 8: Rewards Good Behavior | 7 | 7 | “You just rewarded that behavior and you just started to shift the culture there”. - Faculty |
| Subtheme 9: Sets Expectations, predictable | 31 | 38 | “We had an open discussion about why the case was horrible and that we both did pretty well with managing our expectations and one another.” - Senior/fellow  “So we have that end of the month evaluation. At least you're not thinking, “Oh, I didn't know about this,” but you know, you're giving more feedback in more real time circumstances. So there will be fewer surprises in terms of how they think they're doing.” – Faculty  “That was very deliberate.” - Junior |
| Subtheme 10: Systematic, specific, useful | 62 | 69 | “… but now it's like having this system of, okay, let's talk about all the things you did well.” – Faculty  “‘You didn't do a very good job of exposing the appendix, but you got a good staple below it across the base,’ because it's that specific.” – Faculty  “People used to tell me, Oh, you're doing fine, which is great. I'm doing fine. But I think it gives people that are doing well things to still improve on and continually be working towards something as opposed to where you were, where you're supposed to be.” - Faculty  “I think it's a useful tool.” -Junior  “If you have this in your back pocket as the way that you provide feedback every time somebody asks for it, that's nice because it takes a little bit of the burden off of the person giving feedback, having a structure.” - Senior |
| **Theme 2: Challenges** |  |  |  |
| Subtheme 1: Feedback Fatigue | 3 | 5 | “But when you have a more junior resident like the intern at this, there's a lot of things to be said. Like, I don't know how much they are getting when you would tell them that, what list of things they need to work on at times they seem to get overwhelmed.” - Faculty |
| Subtheme 2: Insight incongruity | 20 | 15 | “Maybe you and the person you're giving feedback to, you don't see eye to eye on things.” - Senior/fellow |
| Subtheme 3: Learning Curve | 3 | 6 | “I think it's not unusual when you first start using it when you're the person, you know, receiving the feedback that you don't think of. You don't think of things that are good right away. It takes a while to like, get your mindset into that. And then also it's hard to formulate a, a plan with, with kind of a time stamp on it.” - Faculty |
| Subtheme 4: Resistance to change | 21 | 30 | “So it like, seems kind of like unnatural. If you weren’t a part of this workshop, the person was like, ‘What are you doing?’ I got a couple of raised eyebrows. Yeah, But I mean, I think overall, once, like I finished talking, it was received decently.” - Senior/Fellow  “Sometimes I feel like some of our older residents maybe… they're not as receptive to feedback.” – Faculty  “Sometimes you need to develop good rapport before you get good feedback.” - Senior/fellow  “A lot of times the attendings are separate from that.” - Senior/fellow |
| Subtheme 5: Time Consuming | 22 | 39 | “I feel like if you really want people to do that, you’ve got to set aside time.” -Seniors/fellows  “it sounds like it's difficult to find like the right time and the right situation to implement it.” Junior  “Time is always an issue.” - Senior/fellow |
| **Theme 3: Requirements** |  |  |  |
| Subtheme 1: Buy In | 15 | 17 | “You feel like they're kind of like not taking the method as seriously.” – Junior  “Sometimes the negative events are pretty impactful on residents attention to it. Sometimes it's hard for that person to be ready to accept, receive feedback because they haven't processed it. So sometimes that makes it difficult at the time when they get feedback.” - Senior/Fellow |
| Subtheme 2: Requires Discipline | 18 | 19 | “I think we have to find that accountability with ourselves, and this can become the self-regulatory process your to have set up all day” - Juniors |
| Subtheme 3: Requires Mutual Respect | 4 | 4 | “Whereas if somebody I respect a lot and I, you know, I see the way they work and they themselves are role model, then when they tell me anything that I'm like closely listening” - Senior/Fellow |
| **Theme 4: Challenges with Traditional Feedback** |  |  |  |
| Subtheme 1: Inconsistent | 5 | 5 | “But I mean we can have the method in place, but we never actually do it at the time schedule to do it right. I don't anticipate unless someone is going out of their way and giving feedback, I'm not actually anticipating getting a lot of active feedback” - Senior/Fellow |
| Subtheme 2: Vague | 4 | 5 | “Specific, right. It's not ‘you suck as a surgeon’, it's ‘here's some really specific things that you did well, the specific places where I think you could improve and here's how you could do it, right” - Senior/Fellow |
| **Theme 5: Workshop Feedback** |  |  |  |
| Subtheme 1: Scenario Incompleteness | 6 | 7 | “It would be good to have to add a scenario that kind of demonstrates a few of the attendings flipped into that mode when somebody else was giving them feedback to kind of force that.” -Senior/Fellow |
| Subtheme 2: Survey Length | 2 | 5 | “It seems like the questions on the app were like redundant or they were the same questions from the first walked in.” -Senior/Fellow |
